# Supplementary material for: Inter-laboratory study of an optimised peptide mapping workflow using automated trypsin digestion for monitoring monoclonal antibody product quality attributes
Source: PubMed Central journal article supplement (PMC7496030; doi:10.1007/s00216-020-02809-z), 2020-07-25
Supplement: 216_2020_2809_MOESM1_ESM.pdf [file 216_2020_2809_MOESM1_ESM.pdf]

**Analytical and Bioanalytical Chemistry**

**Electronic Supplementary Material**

**Interlaboratory study of an optimised peptide mapping workflow  
using automated trypsin digestion for monitoring monoclonal antibody  
product quality attributes**

Silvia Millán-Martín, Craig Jakes, Sara Carillo, Tom Buchanan, Marc Guender,  
Dan Bach Kristensen, Trine Meiborg Sloth, Martin Ørgaard, Ken Cook, Jonathan Bones

Additional files available under [10.1007/s00216-020-02809-z](https://doi.org/10.1007/s00216-020-02809-z)

|                        |                                                                                                                                                                      |
|------------------------|----------------------------------------------------------------------------------------------------------------------------------------------------------------------|
| <b>Table S1</b> .....  | Analytical Instrumentation                                                                                                                                           |
| <b>Table S2</b> .....  | 96-well plate scheme for trypsin digestion                                                                                                                           |
| <b>Table S3</b> .....  | BPF software parameter settings for peptide mapping data analysis                                                                                                    |
| <b>Table S4</b> .....  | CDS software parameter settings for peptide mapping data processing and PTMs quantitation.                                                                           |
| <b>Table S5</b> .....  | MS Component table of CDS software for the studied PTMs (see separate .xlsx file)                                                                                    |
| <b>Figure S1</b> ..... | UV Chromatogram traces (280nm) for trastuzumab RP-UV-MS Intact analysis during digestion time course study using buffer 1                                            |
| <b>Figure S2</b> ..... | Base Peak Chromatograms (BPC) for trastuzumab RP-UV-MS Intact Analysis using 5mM TCEP as reducing agent (a), and without TCEP addition (b)                           |
| <b>Figure S3</b> ..... | Sequence coverage map of trastuzumab obtained using automated tryptic digestion with low pH buffer 1 after 5min.                                                     |
| <b>Figure S4</b> ..... | Sequence coverage map of trastuzumab obtained using automated tryptic digestion with SMART buffer 2 after 5min                                                       |
| <b>Table S6</b> .....  | Sequence coverage for the time course of digestion for trastuzumab                                                                                                   |
| <b>Table S7</b> .....  | Summary of PTMs identified and quantified for trastuzumab after digestion with trypsin beads, low pH buffer and 5mM TCEP addition on the KingFisher Duo Prime system |
| <b>Table S8</b> .....  | Summary of PTMs identified and quantified for trastuzumab after digestion with trypsin beads, SMART buffer and 5mM TCEP addition on the KingFisher Duo Prime system  |
| <b>Table S9</b> .....  | Component list from BPF3.1 software for sequence coverage and Venn diagram (see separate .xlsx file)                                                                 |
| <b>Table S10</b> ..... | Analysis of Variance (ANOVA) to measure intra and inter-lab precision for NISTmAb complete compliant peptide mapping workflow                                        |

**Table S1** Analytical Instrumentation used for the 4 Laboratories across Europe

|              | Site A (Ireland)               | Site B (Denmark)               | Site C (UK)                    | Site D (Switzerland)  |
|--------------|--------------------------------|--------------------------------|--------------------------------|-----------------------|
| UHPLC        | Vanquish™ Flex Binary          | Vanquish™ Duo Ternary          | Vanquish™ Horizon Binary       | Vanquish™ Flex Binary |
| HRMS         | Q Exactive™ Plus               | Q Exactive™ Plus               | Q Exactive™ Plus               | Q Exactive™ Plus      |
| SMART Digest | Magnetic Beads KingFisher™ Duo | Magnetic Beads KingFisher™ Duo | Magnetic Beads KingFisher™ Duo | Manual Magnetic beads |

**Table S2** 96-well plate scheme for trypsin digestion

| Lane     | Content                                  | Volume (µL) |
|----------|------------------------------------------|-------------|
| <b>A</b> | Low pH buffer                            | 150         |
|          | Sample (100µg)                           | 10          |
|          | TCEP (final concentration 5mM)           | 2           |
|          | Water                                    | 38          |
| <b>B</b> | Tip Comb                                 |             |
| <b>C</b> | Empty                                    |             |
| <b>D</b> | Magnetic SMART™ Beads                    | 15          |
|          | Bead Buffer (Low pH buffer)              | 100         |
| <b>E</b> | Bead Wash Buffer (Bead Buffer 1:4 (v/v)) | 200         |
| <b>F</b> | Waste Lane (Water)                       | 250         |

**Table S3** BPF software parameter settings for peptide mapping data analysis

| <b>Component Detection</b>                                                  | <b>Setting</b>                                                                                   |
|-----------------------------------------------------------------------------|--------------------------------------------------------------------------------------------------|
| Absolute MS Signal Threshold                                                | 1.0 x 10 <sup>4</sup> counts                                                                     |
| Typical chromatographic peak width                                          | 0.3                                                                                              |
| Relative MS signal threshold (% base peak)                                  | 1                                                                                                |
| Relative Analog threshold (% of highest peak)                               | 1                                                                                                |
| Width of Gaussian filter (represented as 1/n of chromatographic peak width) | 3                                                                                                |
| Minimum valley to be considered as two chromatographic peaks                | 80.0%                                                                                            |
| Minimum MS peak width (Da)                                                  | 1.2                                                                                              |
| Maximum MS peak width (Da)                                                  | 4.2                                                                                              |
| Mass tolerance (ppm for high-res or Da for low-res)                         | 4.00                                                                                             |
| Maximum retention time shift (min)                                          | 1.00                                                                                             |
| Maximum mass (Da)                                                           | 30,000                                                                                           |
| Mass Centroiding Cutoff (% from base)                                       | 15                                                                                               |
| <b>Identification</b>                                                       | <b>Setting</b>                                                                                   |
| Maximum peptide mass                                                        | 7,000                                                                                            |
| Mass Accuracy                                                               | 5ppm                                                                                             |
| Minimum Confidence                                                          | 0.8                                                                                              |
| Maximum Number of Modifications for a Peptide                               | 1                                                                                                |
| Unspecified Modification                                                    | -58 to +162 Da                                                                                   |
| N-Glycosylation                                                             | CHO                                                                                              |
| Protease Specificity                                                        | High                                                                                             |
| <b>Static Modifications</b>                                                 | <b>Setting</b>                                                                                   |
| Side Chain                                                                  | -                                                                                                |
| <b>Variable Modifications</b>                                               | <b>Setting</b>                                                                                   |
| N Terminal                                                                  | Gln - > Pyro Glu                                                                                 |
| C Terminal                                                                  | Loss of lysine                                                                                   |
| Side Chain                                                                  | Deamidation (N)<br>Deamidation(Q)<br>Glycation (K)<br>Oxidation (MW)<br>AsnAsu (N)<br>AspAsu (D) |

**Table S4** Chromeleon™ Data System 7.2.9 parameter settings for peptide mapping data processing and PTMs quantitation

| <b>MS Detection</b>                   | <b>Setting</b>                  |
|---------------------------------------|---------------------------------|
| Extracted Ion Chromatogram            | MS Default Detection Settings   |
| Detection Algorithm                   | ICIS                            |
| Area noise factor                     | 5                               |
| Peak noise factor                     | 10                              |
| Baseline window                       | 40                              |
| Noise method                          | INCOS                           |
| Min peak width                        | 3                               |
| Multiplet resolution                  | 10                              |
| Area tail extension                   | 5                               |
| Area scan window                      | 0                               |
| <b>MS Component table</b>             | <b>Setting</b>                  |
| Supplementary Table S5 (.xlsx file)   | .wbpf workbook from BPF3.1      |
| <b>MS Settings</b>                    | <b>MS Chromatogram Settings</b> |
| Mass Precision                        | 5 decimal places                |
| Mass Tolerance (manually defined)     | 8.0 ppm                         |
| Smoothing                             | none                            |
| <b>Peptide Table</b>                  | <b>Setting</b>                  |
| Imported from BPF3.1 peptide workbook | -                               |
| <b>Composite Scoring</b>              | <b>Setting</b>                  |
| Pass score if at least                | 2 criteria passed               |
| Fail score if less than               | 1 criteria passed               |
| MS Criteria                           | General MS                      |
| Isotopic dot product                  | $\geq 0.9000$                   |
| Mass accuracy                         | $\leq 5.00$ ppm                 |
| Peal apex alignment                   | $\leq 0.50$ min                 |

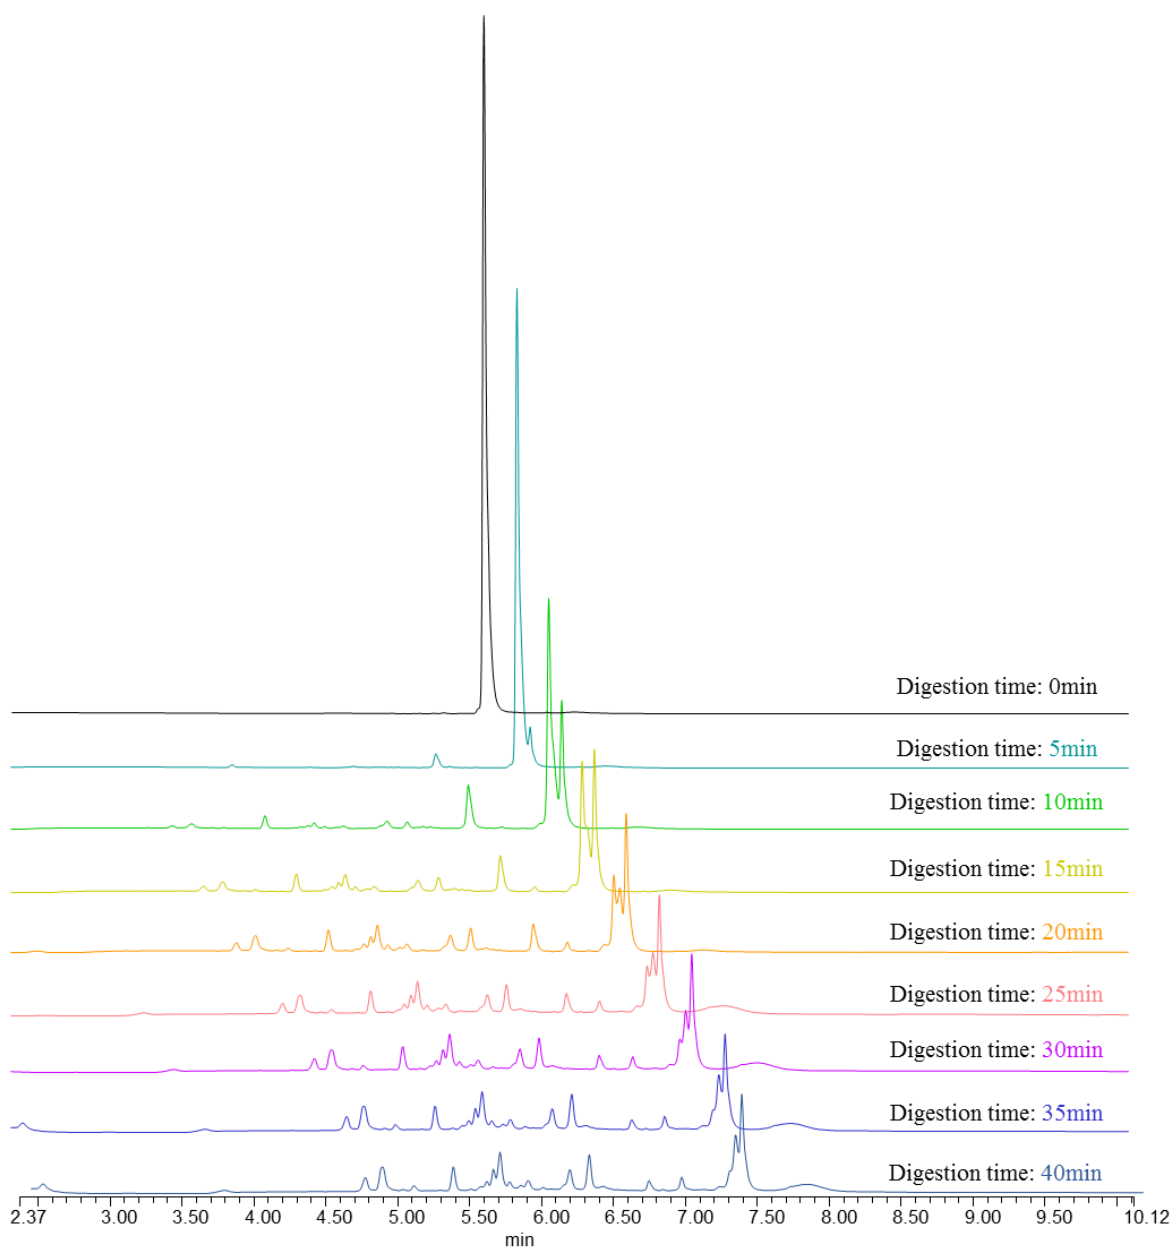

**Fig. S1** UV Chromatogram traces (280nm) for trastuzumab RP-UV-MS Intact analysis during digestion time course study using buffer 1

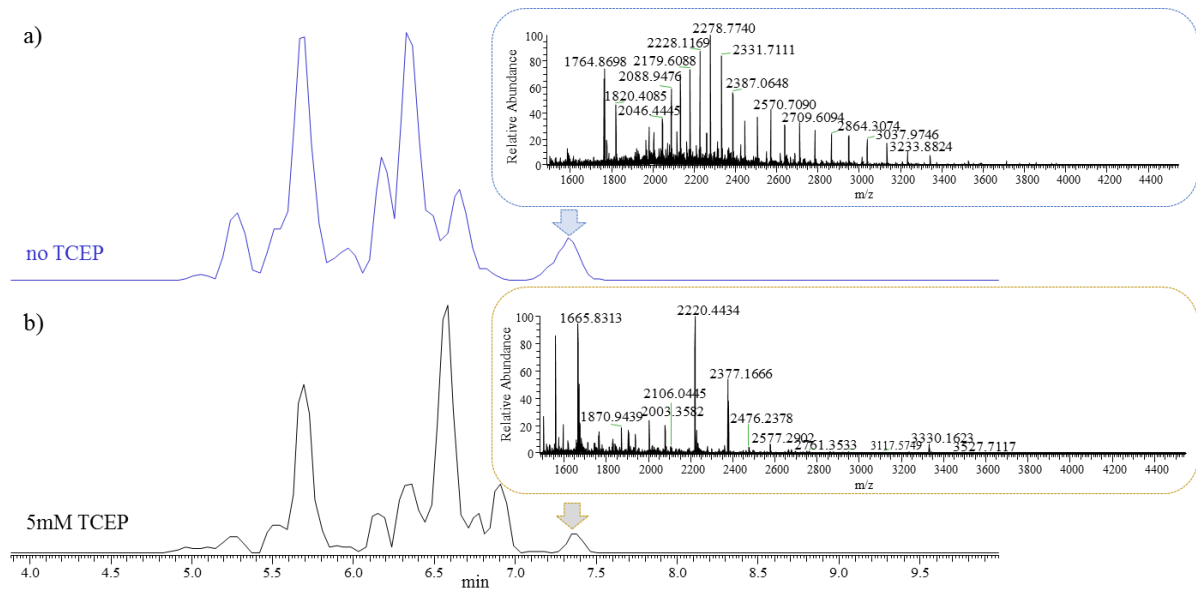

**Fig. S2** Base Peak Chromatograms (BPC) for trastuzumab RP-UV-MS Intact Analysis using 5mM TCEP as reducing agent (a), and without TCEP addition (b). Digestion was performed for 35min and buffer 2

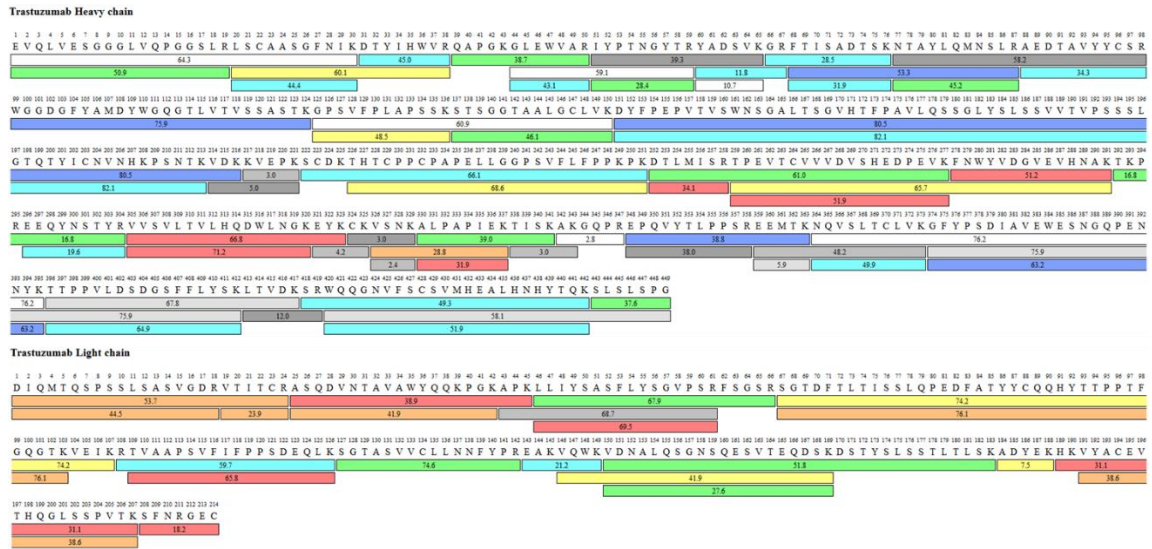

**Fig. S3** Sequence coverage map of trastuzumab heavy (upper panel) and light (lower panel) chains, obtained using automated tryptic digestion with buffer 1 after 5 minutes. The coloured bars show the identified peptides, with the numbers in the bars reflecting the retention time. The different colors indicate the peptide recovery in the MS1 scan: red >50%, orange >20% and yellow >10% represent good recovery. Green, >5%, light blue >2% and cyan >1% represent fair recovery and grey-white scale shows poor recovered peptides



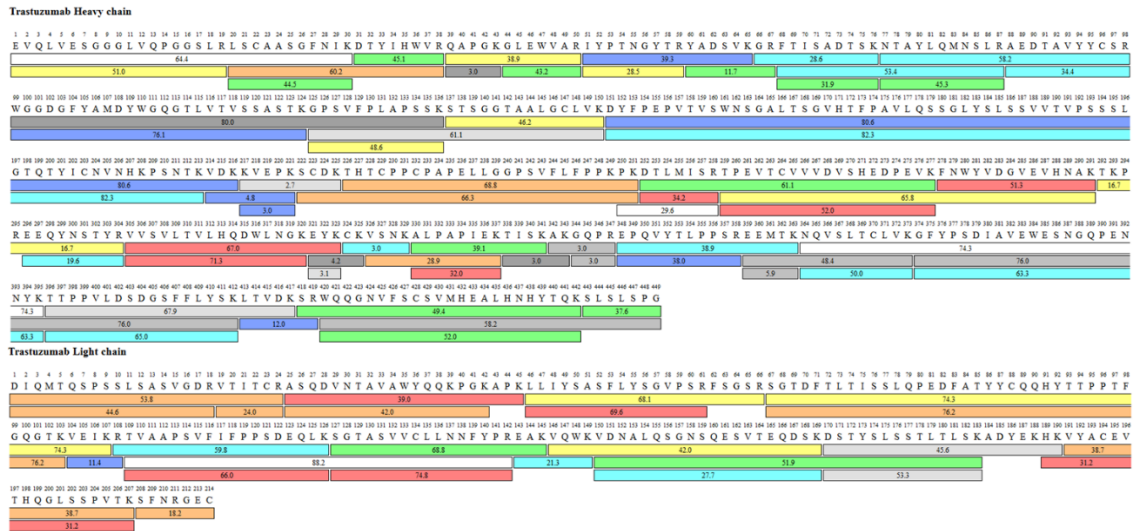

**Fig. S4** Sequence coverage map of trastuzumab heavy (upper panel) and light (lower panel) chains, obtained using automated tryptic digestion with buffer 2 after 5 minutes. The coloured bars show the identified peptides, with the numbers in the bars reflecting the retention time. The different colors indicate the peptide recovery in the MS1 scan: red >50%, orange >20% and yellow >10% represent good recovery. Green, >5%, light blue >2% and cyan >1% represent fair recovery and grey-white scale shows poor recovered peptides

**Table S6** Sequence coverage for the time course of digestion for trastuzumab

| Proteins               |    | Avg Number of MS Peaks (n=3) | Average Sequence Coverage (n=3) |
|------------------------|----|------------------------------|---------------------------------|
| <b>Buffer 1, 5min</b>  | HC | 353                          | 100%                            |
|                        | LC | 103                          | 100%                            |
| <b>Buffer 1, 10min</b> | HC | 449                          | 100%                            |
|                        | LC | 134                          | 100%                            |
| <b>Buffer 1, 15min</b> | HC | 510                          | 100%                            |
|                        | LC | 152                          | 100%                            |
| <b>Buffer 1, 20min</b> | HC | 578                          | 100%                            |
|                        | LC | 167                          | 100%                            |
| <b>Buffer 1, 25min</b> | HC | 570                          | 100%                            |
|                        | LC | 161                          | 100%                            |
| <b>Buffer 1, 30min</b> | HC | 553                          | 100%                            |
|                        | LC | 158                          | 100%                            |
| <b>Buffer 1, 35min</b> | HC | 536                          | 100%                            |
|                        | LC | 147                          | 100%                            |
| <b>Buffer 1, 40min</b> | HC | 594                          | 100%                            |
|                        | LC | 180                          | 100%                            |
| <b>Buffer 2, 5min</b>  | HC | 353                          | 100%                            |
|                        | LC | 95                           | 100%                            |
| <b>Buffer 2, 10min</b> | HC | 548                          | 100%                            |
|                        | LC | 156                          | 100%                            |
| <b>Buffer 2, 15min</b> | HC | 593                          | 100%                            |
|                        | LC | 169                          | 100%                            |
| <b>Buffer 2, 20min</b> | HC | 617                          | 100%                            |
|                        | LC | 172                          | 100%                            |
| <b>Buffer 2, 25min</b> | HC | 621                          | 100%                            |
|                        | LC | 165                          | 100%                            |
| <b>Buffer 2, 30min</b> | HC | 599                          | 100%                            |
|                        | LC | 155                          | 100%                            |
| <b>Buffer 2, 35min</b> | HC | 555                          | 100%                            |
|                        | LC | 149                          | 100%                            |
| <b>Buffer 2, 40min</b> | HC | 649                          | 100%                            |
|                        | LC | 172                          | 100%                            |

**Table S7** Summary of PTMs identified and quantified for trastuzumab after digestion with trypsin beads, buffer 1 and 5mM TCEP addition on the KingFisher™ Duo Prime system

| Modification         | 5min<br>(n=3) | 10min<br>(n=3) | 15min<br>(n=3) | 20min<br>(n=3) | 25min<br>(n=3) | 30min<br>(n=3) | 35min<br>(n=3) | 40min<br>(n=3) |
|----------------------|---------------|----------------|----------------|----------------|----------------|----------------|----------------|----------------|
| HC N55+Deamidation   | —             | 0.63           | 0.61           | 0.98           | 1.17           | 1.78           | 2.23           | 3.64           |
| HC N77+Deamidation   | 0.07          | 0.04           | 0.06           | 0.12           | 0.16           | 0.24           | 0.25           | 0.26           |
| HC N84+Deamidation   | 0.02          | 0.02           | 0.04           | 0.07           | 0.07           | 0.12           | 0.12           | 0.12           |
| HC N289+Deamidation  | 0.00          | 0.00           | 0.00           | 0.00           | 0.00           | 0.00           | 0.00           | 0.00           |
| HC N318+Deamidation  | 0.05          | 0.11           | 0.05           | 0.22           | 0.16           | 0.28           | 0.90           | 0.26           |
| HC N364+Deamidation  | 0.01          | 0.04           | 0.02           | 0.12           | 0.09           | 0.09           | 0.33           | 0.44           |
| LC N30+Deamidation   | 6.82          | 8.41           | 8.24           | 8.89           | 8.94           | 9.23           | 9.80           | 9.12           |
| LC ~N137+Deamidation | 0.88          | 0.30           | 0.21           | 0.72           | 1.26           | 3.73           | 1.30           | 1.53           |
| LC N210+Deamidation  | 0.00          | 0.00           | 0.00           | 0.00           | 0.01           | 0.02           | 0.02           | 0.07           |
| HC M255+Oxidation    | 1.36          | 1.06           | 1.11           | 1.02           | 1.13           | 1.24           | 1.10           | 1.25           |
| HC M431+Oxidation    | 0.07          | 0.19           | 0.19           | 0.18           | 0.21           | 0.14           | 0.22           | 0.15           |
| HC G449+Lys          | 1.08          | 1.44           | 1.60           | 1.62           | 1.66           | 1.60           | 1.83           | 1.69           |
| HC N55+AsnAsu        | 1.00          | 1.21           | 1.45           | 2.14           | 2.36           | 2.93           | 3.39           | 3.60           |
| HC N318+AsnAsu       | 0.48          | 1.05           | 1.74           | 2.77           | 3.38           | 3.93           | 3.41           | 3.90           |
| LC N30+AsnAsu        | 0.19          | 1.48           | 1.53           | 1.08           | 0.87           | 0.50           | 0.50           | 0.31           |
| LC ~N138+AsnAsu      | 9.67          | 1.49           | 1.71           | 3.06           | 3.87           | 7.43           | 2.04           | 1.92           |

**Table S7 (continued)** Summary of PTMs identified and quantified for trastuzumab after digestion with trypsin beads, buffer 1 and 5mM TCEP addition on the KingFisher™ Duo Prime system

| Modification           | 5min<br>(n=3) | 10min<br>(n=3) | 15min<br>(n=3) | 20min<br>(n=3) | 25min<br>(n=3) | 30min<br>(n=3) | 35min<br>(n=3) | 40min<br>(n=3) |
|------------------------|---------------|----------------|----------------|----------------|----------------|----------------|----------------|----------------|
| HC ~D102+AspAsu        | 0.21          | 0.48           | 0.73           | 0.92           | 1.10           | 1.52           | 1.27           | 1.47           |
| HC ~D283+AspAsu        | 0.53          | 1.49           | 2.57           | 2.68           | 2.57           | 4.02           | 3.64           | 4.54           |
| HC ~D404+AspAsu        | 0.28          | 0.03           | 0.01           | 1.43           | 1.64           | 1.56           | 1.29           | 1.033          |
| HC D224+isomerization  | 69.11         | 55.64          | 70.37          | 52.95          | 66.25          | 66.19          | 75.22          | 84.46          |
| HC N300+A1G0           | 2.07          | 2.35           | 2.16           | 2.15           | 2.10           | 2.10           | 2.00           | 2.16           |
| HC N300+A1G0F          | 11.43         | 8.76           | 7.43           | 7.28           | 6.40           | 5.48           | 7.27           | 6.32           |
| HC N300+A1G1F          | 3.26          | 1.99           | 1.75           | 1.76           | 1.45           | 1.19           | 1.64           | 1.78           |
| HC N300+A2G0           | 3.78          | 5.16           | 5.46           | 5.56           | 5.69           | 5.86           | 5.62           | 5.82           |
| HC N300+A2G0F          | 48.99         | 50.91          | 52.15          | 52.18          | 53.23          | 54.56          | 52.07          | 51.93          |
| HC N300+A2G1F          | 22.04         | 22.69          | 23.41          | 23.44          | 23.50          | 23.19          | 23.86          | 23.27          |
| HC N300+A2G2F          | 2.00          | 1.84           | 1.91           | 1.75           | 1.80           | 1.79           | 2.16           | 2.17           |
| HC N300+M5             | 2.17          | 2.11           | 2.08           | 2.15           | 2.16           | 2.29           | 2.05           | 2.26           |
| HC N300+Unglycosylated | 4.26          | 4.18           | 3.63           | 3.73           | 3.65           | 3.53           | 3.32           | 4.28           |

**Table S8** Summary of PTMs identified and quantified for trastuzumab after digestion with trypsin beads, buffer 2 and 5mM TCEP addition on the KingFisher™ Duo Prime system

| Modification         | 5min<br>(n=3) | 10min<br>(n=3) | 15min<br>(n=3) | 20min<br>(n=3) | 25min<br>(n=3) | 30min<br>(n=3) | 35min<br>(n=3) | 40min<br>(n=3) |
|----------------------|---------------|----------------|----------------|----------------|----------------|----------------|----------------|----------------|
| HC N55+Deamidation   | 0.64          | 0.48           | 0.85           | 1.04           | 1.69           | 1.95           | 3.14           | 3.58           |
| HC N77+Deamidation   | 0.01          | 0.02           | 0.08           | 0.13           | 0.15           | 0.19           | 0.29           | 0.36           |
| HC N84+Deamidation   | 0.14          | 0.02           | 0.05           | 0.07           | 0.09           | 0.09           | 0.08           | 0.15           |
| HC N289+Deamidation  | 0.01          | 0.02           | 0.04           | 0.05           | 0.14           | 0.075          | 0.04           | 0.09           |
| HC N318+Deamidation  | 0.05          | 0.43           | 0.28           | 1.17           | 0.62           | 1.43           | 1.023          | 3.26           |
| HC N364+Deamidation  | 0.00          | 0.01           | 0.01           | 0.13           | 0.21           | 0.13           | 0.42           | 0.47           |
| LC N30+Deamidation   | 6.92          | 8.90           | 8.88           | 9.65           | 9.34           | 9.58           | 10.06          | 9.40           |
| LC ~N137+Deamidation | 0.00          | 0.27           | 0.62           | 1.11           | 2.10           | 5.00           | 1.33           | 2.60           |
| LC N210+Deamidation  | 0.00          | 0.00           | 0.00           | 0.01           | 0.02           | 0.03           | 0.04           | 0.07           |
| HC M255+Oxidation    | 1.18          | 0.48           | 0.47           | 0.43           | 0.48           | 0.85           | 0.29           | 0.26           |
| HC M431+Oxidation    | 0.09          | 0.17           | 0.17           | 0.15           | 0.15           | 0.14           | 0.17           | 0.17           |
| HC G449+Lys          | 0.57          | 1.44           | 1.53           | 1.63           | 1.63           | 1.56           | 1.81           | 1.76           |
| HC N55+AsnAsu        | 1.30          | 1.22           | 1.89           | 2.29           | 2.73           | 3.24           | 3.57           | 3.52           |
| HC N318+AsnAsu       | 0.51          | 1.52           | 3.03           | 6.31           | 5.49           | 9.19           | 3.90           | 4.44           |
| LC N30+AsnAsu        | 0.31          | 1.32           | 0.89           | 0.73           | 0.48           | 0.39           | 0.27           | 0.21           |
| LC ~N137+AsnAsu      | 0.00          | 0.00           | 0.02           | 0.02           | 0.00           | 0.00           | 0.00           | 0.00           |

**Table S8 (continued)** Summary of PTMs identified and quantified for trastuzumab after digestion with trypsin beads, buffer 2 and 5mM TCEP addition on the KingFisher™ Duo Prime system.

| Modification           | 5min<br>(n=3) | 10min<br>(n=3) | 15min<br>(n=3) | 20min<br>(n=3) | 25min<br>(n=3) | 30min<br>(n=3) | 35min<br>(n=3) | 40min<br>(n=3) |
|------------------------|---------------|----------------|----------------|----------------|----------------|----------------|----------------|----------------|
| HC ~D102+AspAsu        | 0.37          | 0.16           | 0.80           | 0.81           | 0.96           | 1.38           | 1.14           | 1.11           |
| HC ~D283+AspAsu        | 0.90          | 0.46           | 4.02           | 6.45           | 5.28           | 6.92           | 3.57           | 4.54           |
| HC ~D404+AspAsu        | 0.03          | 1.32           | 2.02           | 2.21           | 1.13           | 1.84           | 0.68           | 1.90           |
| HC D224+isomerization  | 0.03          | 52.43          | 45.51          | 45.68          | 64.12          | 54.92          | 49.51          | 47.36          |
| HC N300+A1G0           | 1.98          | 2.35           | 2.15           | 2.07           | 2.10           | 2.10           | 2.11           | 2.04           |
| HC N300+A1G0F          | 7.54          | 10.03          | 7.75           | 7.12           | 6.38           | 5.43           | 7.56           | 6.73           |
| HC N300+A1G1F          | 1.85          | 2.35           | 1.51           | 1.72           | 1.34           | 1.16           | 1.52           | 1.17           |
| HC N300+A2G0           | 4.48          | 5.03           | 5.29           | 5.42           | 5.64           | 5.93           | 5.29           | 5.51           |
| HC N300+A2G0F          | 53.65         | 50.11          | 52.68          | 52.89          | 53.19          | 54.71          | 52.33          | 52.80          |
| HC N300+A2G1F          | 23.28         | 22.74          | 23.59          | 23.64          | 23.99          | 23.17          | 23.82          | 24.43          |
| HC N300+A2G2F          | 1.77          | 2.05           | 2.15           | 2.18           | 2.17           | 1.98           | 2.22           | 2.27           |
| HC N300+M5             | 1.99          | 2.01           | 2.03           | 2.06           | 2.16           | 2.26           | 2.02           | 2.14           |
| HC N300+Unglycosylated | 3.45          | 3.33           | 2.84           | 2.89           | 3.02           | 3.26           | 3.12           | 2.90           |

**Table S10** Analysis of Variance (ANOVA) to measure intra and inter-lab precision for NISTmAb complete compliant peptide mapping workflow

| HC N328+Deam               |              |           |           |          |                |               |
|----------------------------|--------------|-----------|-----------|----------|----------------|---------------|
| <i>Source of Variation</i> | <i>SS</i>    | <i>df</i> | <i>MS</i> | <i>F</i> | <i>P-value</i> | <i>F crit</i> |
| Between Groups             | 0.1001       | 3         | 0.0334    | 153.9872 | 2.05E-07       | 4.0662        |
| Within Groups              | 0.0017       | 8         | 0.0002    |          |                |               |
| Intra-Lab precision (RSD)  | <b>10.22</b> |           |           |          |                |               |
| Inter-Lab precision (RSD)  | <b>44.43</b> |           |           |          |                |               |

| HC N364+Deam               |               |           |           |          |                |               |
|----------------------------|---------------|-----------|-----------|----------|----------------|---------------|
| <i>Source of Variation</i> | <i>SS</i>     | <i>df</i> | <i>MS</i> | <i>F</i> | <i>P-value</i> | <i>F crit</i> |
| Between Groups             | 0.1659        | 3         | 0.0553    | 49.1556  | 1.69E-05       | 4.0662        |
| Within Groups              | 0.0090        | 8         | 0.0011    |          |                |               |
| Intra-Lab precision (RSD)  | <b>42.16</b>  |           |           |          |                |               |
| Inter-Lab precision (RSD)  | <b>101.64</b> |           |           |          |                |               |

| HC ~N392/N387+ Deam        |               |           |           |          |                |               |
|----------------------------|---------------|-----------|-----------|----------|----------------|---------------|
| <i>Source of Variation</i> | <i>SS</i>     | <i>df</i> | <i>MS</i> | <i>F</i> | <i>P-value</i> | <i>F crit</i> |
| Between Groups             | 0.7405        | 3         | 0.2468    | 219.4049 | 5.09E-08       | 4.0662        |
| Within Groups              | 0.0090        | 8         | 0.0011    |          |                |               |
| Intra-Lab precision (RSD)  | <b>20.22</b>  |           |           |          |                |               |
| Inter-Lab precision (RSD)  | <b>105.25</b> |           |           |          |                |               |

| HC D283+Succ               |              |           |           |          |                |               |
|----------------------------|--------------|-----------|-----------|----------|----------------|---------------|
| <i>Source of Variation</i> | <i>SS</i>    | <i>df</i> | <i>MS</i> | <i>F</i> | <i>P-value</i> | <i>F crit</i> |
| Between Groups             | 8.3645       | 3         | 2.7882    | 420.8549 | 3.86E-09       | 4.0662        |
| Within Groups              | 0.0530       | 8         | 0.0066    |          |                |               |
| Intra-Lab precision (RSD)  | <b>8.61</b>  |           |           |          |                |               |
| Inter-Lab precision (RSD)  | <b>62.24</b> |           |           |          |                |               |

| HC N318+Succ               |              |           |           |          |                |               |
|----------------------------|--------------|-----------|-----------|----------|----------------|---------------|
| <i>Source of Variation</i> | <i>SS</i>    | <i>df</i> | <i>MS</i> | <i>F</i> | <i>P-value</i> | <i>F crit</i> |
| Between Groups             | 0.7734       | 3         | 0.2578    | 52.6100  | 1.31E-05       | 4.0662        |
| Within Groups              | 0.0392       | 8         | 0.0049    |          |                |               |
| Intra-Lab precision (RSD)  | <b>8.28</b>  |           |           |          |                |               |
| Inter-Lab precision (RSD)  | <b>20.68</b> |           |           |          |                |               |

| HC ~N392/N387+Succ         |           |           |           |          |                |               |
|----------------------------|-----------|-----------|-----------|----------|----------------|---------------|
| <i>Source of Variation</i> | <i>SS</i> | <i>df</i> | <i>MS</i> | <i>F</i> | <i>P-value</i> | <i>F crit</i> |
| Between Groups             | 0.8415    | 3         | 0.2805    | 125.5970 | 4.56E-07       | 4.0662        |
| Within Groups              | 0.0179    | 8         | 0.0022    |          |                |               |

|                           |              |
|---------------------------|--------------|
| Intra-Lab precision (RSD) | <b>5.54</b>  |
| Inter-Lab precision (RSD) | <b>21.73</b> |

**Table S10 (continued)** Analysis of Variance (ANOVA) to measure intra and inter-lab precision for NISTmAb complete compliant peptide mapping workflow

HC M255+Oxid

| <i>Source of Variation</i> | <i>SS</i>    | <i>df</i> | <i>MS</i> | <i>F</i> | <i>P-value</i> | <i>F crit</i> |
|----------------------------|--------------|-----------|-----------|----------|----------------|---------------|
| Between Groups             | 0.2813       | 3         | 0.0938    | 468.8194 | 2.51E-09       | 4.0662        |
| Within Groups              | 0.0016       | 8         | 0.0002    |          |                |               |
| Intra-Lab precision (RSD)  | <b>3.54</b>  |           |           |          |                |               |
| Inter-Lab precision (RSD)  | <b>27.04</b> |           |           |          |                |               |

HC K450 Lys Loss

| <i>Source of Variation</i> | <i>SS</i>   | <i>df</i> | <i>MS</i> | <i>F</i> | <i>P-value</i> | <i>F crit</i> |
|----------------------------|-------------|-----------|-----------|----------|----------------|---------------|
| Between Groups             | 21.0218     | 3         | 7.0073    | 225.5554 | 4.57E-08       | 4.0662        |
| Within Groups              | 0.2485      | 8         | 0.0311    |          |                |               |
| Intra-Lab precision (RSD)  | <b>0.56</b> |           |           |          |                |               |
| Inter-Lab precision (RSD)  | <b>2.96</b> |           |           |          |                |               |

HC Q1+Gln->Pyro-Glu

| <i>Source of Variation</i> | <i>SS</i>   | <i>df</i> | <i>MS</i> | <i>F</i> | <i>P-value</i> | <i>F crit</i> |
|----------------------------|-------------|-----------|-----------|----------|----------------|---------------|
| Between Groups             | 0.4365      | 3         | 0.1455    | 831.3651 | 2.57E-10       | 4.0662        |
| Within Groups              | 0.0014      | 8         | 0.0002    |          |                |               |
| Intra-Lab precision (RSD)  | <b>0.04</b> |           |           |          |                |               |
| Inter-Lab precision (RSD)  | <b>0.38</b> |           |           |          |                |               |

HC N300+M5

| <i>Source of Variation</i> | <i>SS</i>    | <i>df</i> | <i>MS</i> | <i>F</i> | <i>P-value</i> | <i>F crit</i> |
|----------------------------|--------------|-----------|-----------|----------|----------------|---------------|
| Between Groups             | 0.6293       | 3         | 0.2098    | 143.0152 | 2.74E-07       | 4.0662        |
| Within Groups              | 0.0117       | 8         | 0.0015    |          |                |               |
| Intra-Lab precision (RSD)  | <b>8.14</b>  |           |           |          |                |               |
| Inter-Lab precision (RSD)  | <b>34.11</b> |           |           |          |                |               |



**Table S10 (continued)** Analysis of Variance (ANOVA) to measure intra and inter-lab precision for NISTmAb complete compliant peptide mapping workflow

| HC N300+A1G0F              |              |           |           |          |                |               |
|----------------------------|--------------|-----------|-----------|----------|----------------|---------------|
| <i>Source of Variation</i> | <i>SS</i>    | <i>df</i> | <i>MS</i> | <i>F</i> | <i>P-value</i> | <i>F crit</i> |
| Between Groups             | 94.4941      | 3         | 31.4980   | 438.9969 | 3.26E-09       | 4.0662        |
| Within Groups              | 0.5740       | 8         | 0.0718    |          |                |               |
| Intra-Lab precision (RSD)  | <b>9.10</b>  |           |           |          |                |               |
| Inter-Lab precision (RSD)  | <b>67.20</b> |           |           |          |                |               |

| HC N300+A2G0F              |             |           |           |          |                |               |
|----------------------------|-------------|-----------|-----------|----------|----------------|---------------|
| <i>Source of Variation</i> | <i>SS</i>   | <i>df</i> | <i>MS</i> | <i>F</i> | <i>P-value</i> | <i>F crit</i> |
| Between Groups             | 36.8955     | 3         | 12.2985   | 55.2535  | 1.09E-05       | 4.0662        |
| Within Groups              | 1.7807      | 8         | 0.2226    |          |                |               |
| Intra-Lab precision (RSD)  | <b>3.43</b> |           |           |          |                |               |
| Inter-Lab precision (RSD)  | <b>8.79</b> |           |           |          |                |               |

| HC N300+A1G1F              |              |           |           |          |                |               |
|----------------------------|--------------|-----------|-----------|----------|----------------|---------------|
| <i>Source of Variation</i> | <i>SS</i>    | <i>df</i> | <i>MS</i> | <i>F</i> | <i>P-value</i> | <i>F crit</i> |
| Between Groups             | 14.1954      | 3         | 4.7318    | 183.6998 | 1.03E-07       | 4.0662        |
| Within Groups              | 0.2061       | 8         | 0.0258    |          |                |               |
| Intra-Lab precision (RSD)  | <b>9.18</b>  |           |           |          |                |               |
| Inter-Lab precision (RSD)  | <b>43.65</b> |           |           |          |                |               |

| HC N300+A2G1F              |             |           |           |          |                |               |
|----------------------------|-------------|-----------|-----------|----------|----------------|---------------|
| <i>Source of Variation</i> | <i>SS</i>   | <i>df</i> | <i>MS</i> | <i>F</i> | <i>P-value</i> | <i>F crit</i> |
| Between Groups             | 38.3946     | 3         | 12.7982   | 196.0907 | 7.93E-08       | 4.0662        |
| Within Groups              | 0.5221      | 8         | 0.0653    |          |                |               |
| Intra-Lab precision (RSD)  | <b>2.01</b> |           |           |          |                |               |
| Inter-Lab precision (RSD)  | <b>9.90</b> |           |           |          |                |               |

| HC N300+A2G2F              |              |           |           |          |                |               |
|----------------------------|--------------|-----------|-----------|----------|----------------|---------------|
| <i>Source of Variation</i> | <i>SS</i>    | <i>df</i> | <i>MS</i> | <i>F</i> | <i>P-value</i> | <i>F crit</i> |
| Between Groups             | 4.7004       | 3         | 1.5668    | 104.6852 | 9.28E-07       | 4.0662        |
| Within Groups              | 0.1197       | 8         | 0.0150    |          |                |               |
| Intra-Lab precision (RSD)  | <b>4.65</b>  |           |           |          |                |               |
| Inter-Lab precision (RSD)  | <b>16.62</b> |           |           |          |                |               |

| HC N300+ A2Ga1G1F          |              |           |           |          |                |               |
|----------------------------|--------------|-----------|-----------|----------|----------------|---------------|
| <i>Source of Variation</i> | <i>SS</i>    | <i>df</i> | <i>MS</i> | <i>F</i> | <i>P-value</i> | <i>F crit</i> |
| Between Groups             | 0.3505       | 3         | 0.1168    | 175.2333 | 1.23E-07       | 4.0662        |
| Within Groups              | 0.0053       | 8         | 0.0007    |          |                |               |
| Intra-Lab precision (RSD)  | <b>6.24</b>  |           |           |          |                |               |
| Inter-Lab precision (RSD)  | <b>28.99</b> |           |           |          |                |               |
